# Supplementary material for: Clients’ experiences utilizing a safer conception service for HIV affected individuals: implications for differentiated care service delivery models
Source: PubMed Central journal article supplement (PMC6538560; doi:10.1186/s12978-019-0718-5), 2019-05-29
Supplement: 12978_2019_718_MOESM2_ESM.pdf [file 12978_2019_718_MOESM2_ESM.pdf]

## **Experiências dos clientes que utilizam um serviço de concepção mais seguro para pessoas infectadas com o VIH: Implicações para os modelos de prestação de serviços de cuidados diferenciados**

Sheree Schwartz<sup>1,2\*</sup>, Natasha Davies<sup>2</sup>, Nicolette Naidoo<sup>2</sup>, Diantha Pillay<sup>2</sup>, Nokuthula Makhoba<sup>2</sup>, Saiqa Mullick<sup>2</sup>

<sup>1</sup> Department of Epidemiology, Johns Hopkins School of Public Health, Baltimore, MD, USA

<sup>2</sup> Wits Reproductive Health Institute, University of the Witwatersrand, Johannesburg, South Africa

### **\*Autor correspondente:**

Dr. Sheree Schwartz, 615 N. Wolfe St, E7644, Baltimore, MD, USA, 21205. E-mail: sswartz@jhu.edu

### **Endereços de e-mail:**

Natasha Davies: [davies@anovahealth.co.za](mailto:davies@anovahealth.co.za)

Nicolette Naidoo: [NNaidoo@wrhi.ac.za](mailto:NNaidoo@wrhi.ac.za)

Diantha Pillay: [DPillay@wrhi.ac.za](mailto:DPillay@wrhi.ac.za)

Nokuthula Makhoba: [NMakhoba@wrhi.ac.za](mailto:NMakhoba@wrhi.ac.za)

Saiqa Mullick: [SMullick@wrhi.ac.za](mailto:SMullick@wrhi.ac.za)

## **RESUMO**

**Introdução:** Os serviços de concepção mais seguros promovem a saúde e os direitos reprodutivos das famílias, ao mesmo tempo que minimizam os riscos de transmissão do VIH entre casais que estão a tentar conceber, bem como os riscos de transmissão vertical. Os dados de implementação, incluindo as experiências dos clientes que utilizam serviços de concepção mais seguros na África Subsaariana, são limitados.

**Métodos:** O centro comunitário de saúde de Hillbrow começou a oferecer serviços de concepção mais seguros para pessoas e casais infectados com VIH em Joanesburgo, África do Sul, em junho de 2015. Foram recrutados consecutivamente clientes a utilizar serviços de concepção mais seguros para uma subamostra estratificada, desde abril de 2016 até agosto de 2017, para uma entrevista transversal que avaliou as perceções dos clientes em relação à aceitabilidade e ao valor dos serviços, bem como o conhecimento e a eficácia pessoal em termos de concepção mais

segura. Também foi utilizada uma escala analógica visual de 0 a 100 para avaliar as experiências dos clientes, cujas pontuações foram classificadas em termos de aceitação, valor, conhecimento e eficácia pessoal como reduzida ( $<50$ ), moderada (entre  $\geq 50$  e  $\leq 79$ ) e elevada ( $\geq 80$ ), respetivamente. A comparação das pontuações foi efetuada após presença nas consultas de conceção mais segura.

**Resultados:** Entre os 692 clientes a utilizar serviços de conceção mais seguros, foram incluídos na amostra 120 (17%) para o processo de avaliação, sendo as características da subamostra dos participantes semelhantes ao grupo global. Os clientes atribuíram uma pontuação média de  $\geq 90$  para cada questão que avaliava a aceitabilidade do serviço, com 96% (114/119) a indicar um valor de perceção elevada (pontuações  $\geq 80$ ) para consultas regulares de conceção mais segura até ao momento de conceção. 58% dos clientes ( $n=70$ ) indicaram que adquiriram novos conhecimentos durante a consulta concluída no dia do inquérito, apesar de a aquisição de novas informações apresentar uma tendência para diminuir com a continuação das consultas ( $p=0,09$ ). Em termos de estratégias de conceção mais seguras, 80% dos clientes afirmaram ter um elevado nível de conhecimento sobre o impacto do tratamento antirretroviral (TAR) e supressão vírica da transmissão do VIH, 67% indicaram um nível elevado de conhecimento sobre a importância do rastreio de IST e 56% relativamente à limitação de sexo sem preservativo nos dias de fertilidade máxima; 34% de casais serodiferentes afirmaram ter um conhecimento elevado sobre profilaxia de pré-exposição. O nível de eficácia pessoal variou entre métodos de conceção mais seguros e foi semelhante em todas as consultas do estudo.

**Conclusões:** Os clientes consideraram as consultas de conceção mais segura valiosas e preferiram ter uma presença regular nas mesmas até ao momento de conceção, contudo foi

possível observar uma estagnação nos conhecimentos e eficácia pessoal durante as consultas subsequentes após a participação inicial nos cuidados de concepção mais segura. Os serviços mais intensivos poderão ser mais adequados para determinados clientes com base em circunstâncias clínicas, mas muitos casais podem potencialmente receber uma abordagem "mais leve" e minimizar na mesma os riscos de transmissão do VIH.

**Palavras-chave:** Concepção mais segura, VIH, prevenção do VIH, cuidados diferenciados, casais discordantes, implementação

### **Sobre este suplemento**

Este resumo foi publicado como parte da revista científica *Reproductive Health*, Volume 16, Suplemento 1, 2019: Integração Eficaz dos Serviços de Saúde Sexual e Reprodutiva e de Prevenção, Cuidados e Tratamento do VIH na África Subsariana: Onde estão as provas da implementação do programa?

O suplemento foi publicado como uma colaboração entre as revistas científicas *Reproductive Health* e *BMC Public Health*. O conteúdo integral, incluindo as versões em francês, português e inglês, estão disponíveis online:

<https://bmcpublichealth.biomedcentral.com/articles/supplements/volume-19-supplement-1>

e

<https://reproductive-health-journal.biomedcentral.com/articles/supplements/volume-16-supplement-1>
